# Supplementary material for: Rotating cell culture system-induced injectable self-assembled microtissues with epidermal stem cells for full-thickness skin repair
Source: PeerJ journal article supplement (doi:10.7717/peerj.18418), 2024-10-31
Supplement: MIQE_checklist.pdf [file MIQE_checklist.pdf]

Table 1. MIQE checklist for authors, reviewers, and editors.

| Item to check                                                     | Importance | Section/line number, or reason for not reporting |
|-------------------------------------------------------------------|------------|--------------------------------------------------|
| Experimental design                                               |            |                                                  |
| Definition of experimental and control groups                     | E          | Line 125                                         |
| Number within each group                                          | E          | Line 126                                         |
| Assay carried out by the core or investigator's laboratory?       | D          |                                                  |
| Acknowledgment of authors' contributions                          | D          |                                                  |
| Sample                                                            |            |                                                  |
| Description                                                       | E          | Line 126                                         |
| Volume/mass of sample processed                                   | D          |                                                  |
| Microdissection or macrodissection                                | E          | Not Applicable                                   |
| Processing procedure                                              | E          | Line 126-127                                     |
| If frozen, how and how quickly?                                   | E          | Line 126-127                                     |
| If fixed, with what and how quickly?                              | E          | Not Applicable                                   |
| Sample storage conditions and duration (especially for FFPEb samp | E          | Line 126-127                                     |
| Nucleic acid extraction                                           |            |                                                  |
| Procedure and/or instrumentation                                  | E          | Line 127-128                                     |
| Name of kit and details of any modifications                      | E          | Line 127-128                                     |
| Source of additional reagents used                                | D          |                                                  |
| Details of DNase or RNase treatment                               | E          | Line 127-128                                     |
| Contamination assessment (DNA or RNA)                             | E          | Line 127-128                                     |
| Nucleic acid quantification                                       | E          | Line 127-128                                     |
| Instrument and method                                             | E          | Line 127-128                                     |
| Purity (A260/A280)                                                | D          |                                                  |
| Yield                                                             | D          |                                                  |
| RNA integrity: method/instrument                                  | E          | Line 127-128                                     |
| RIN/RQI or Cq of 3 and 5 transcripts                              | E          | Not Applicable                                   |
| Electrophoresis traces                                            | D          |                                                  |
| Inhibition testing (Cq dilutions, spike, or other)                | E          | Not Applicable                                   |
| Reverse transcription                                             |            |                                                  |
| Complete reaction conditions                                      | E          | Line 128                                         |
| Amount of RNA and reaction volume                                 | E          | Line 128                                         |
| Priming oligonucleotide (if using GSP) and concentration          | E          | Not Applicable                                   |
| Reverse transcriptase and concentration                           | E          | Line 128                                         |
| Temperature and time                                              | E          | Line 128-130                                     |
| Manufacturer of reagents and catalogue numbers                    | D          | Line 129                                         |
| Cqs with and without reverse transcription                        | D          |                                                  |
| Storage conditions of Cdna                                        | D          |                                                  |
| qPCR target information                                           |            |                                                  |
| Gene symbol                                                       | E          | Line 134                                         |
| Sequence accession number                                         | E          | Line 134                                         |
| Location of amplicon                                              | D          |                                                  |
| Amplicon length                                                   | E          | Not Applicable                                   |
| In silico specificity screen (BLAST, and so on)                   | E          | Not Applicable                                   |
| Pseudogenes, retropseudogenes, or other homologs?                 | D          |                                                  |
| Sequence alignment                                                | D          |                                                  |
| Secondary structure analysis of amplicon                          | D          |                                                  |

|                                                                          |   |                |
|--------------------------------------------------------------------------|---|----------------|
| Location of each primer by exon or intron (if applicable)                | E | Not Applicable |
| What splice variants are targeted?                                       | E | Not Applicable |
| qPCR oligonucleotides                                                    |   |                |
| Primer sequences                                                         | E | Line 134       |
| RTPrimerDB identification number                                         | D |                |
| Probe sequences                                                          | D |                |
| Location and identity of any modifications                               | E | Not Applicable |
| Manufacturer of oligonucleotides                                         | D |                |
| Purification method                                                      | D |                |
| qPCR protocol                                                            |   |                |
| Complete reaction conditions                                             | E | Line 130-132   |
| Reaction volume and amount of cDNA/DNA                                   | E | Line 130       |
| Primer, (probe), Mg <sup>2+</sup> , and dNTP concentrations              | E | Line 130-132   |
| Polymerase identity and concentration                                    | E | Not Applicable |
| Buffer/kit identity and manufacturer                                     | E | Line 130-132   |
| Exact chemical composition of the buffer                                 | D |                |
| Additives (SYBR Green I, DMSO, and so forth)                             | E | Line 130-132   |
| Manufacturer of plates/tubes and catalog number                          | D |                |
| Complete thermocycling parameters                                        | E | Line 130-132   |
| Reaction setup (manual/robotic)                                          | D |                |
| Manufacturer of qPCR instrument                                          | E | Line 130-132   |
| qPCR validation                                                          |   |                |
| Evidence of optimization (from gradients)                                | D |                |
| Specificity (gel, sequence, melt, or digest)                             | E | Not Applicable |
| For SYBR Green I, C <sub>q</sub> of the NTC                              | E | Not Applicable |
| Calibration curves with slope and y intercept                            | E | Not Applicable |
| PCR efficiency calculated from slope                                     | E | Not Applicable |
| CIs for PCR efficiency or SE                                             | D |                |
| r <sup>2</sup> of calibration curve                                      | E | Not Applicable |
| Linear dynamic range                                                     | E | Not Applicable |
| C <sub>q</sub> variation at LOD                                          | E | Not Applicable |
| CIs throughout range                                                     | D |                |
| Evidence for LOD                                                         | E | Not Applicable |
| If multiplex, efficiency and LOD of each assay                           | E | Not Applicable |
| Data analysis                                                            |   |                |
| qPCR analysis program (source, version)                                  | E | Line 132       |
| Method of C <sub>q</sub> determination                                   | E | Line 132       |
| Outlier identification and disposition                                   | E | Line 132-133   |
| Results for NTCs                                                         | E | Not Applicable |
| Justification of number and choice of reference genes                    | E | Line 132       |
| Description of normalization method                                      | E | Line 133       |
| Number and concordance of biological replicates                          | D |                |
| Number and stage (reverse transcription or qPCR) of technical replicates | E | Line 133       |
| Repeatability (intraassay variation)                                     | E | Line 133       |
| Reproducibility (interassay variation, CV)                               | D |                |
| Power analysis                                                           | D |                |
| Statistical methods for results significance                             | E | Line 180-181   |
| Software (source, version)                                               | E | Line 178       |

|                                     |   |  |
|-------------------------------------|---|--|
| Cq or raw data submission with RDML | D |  |
|-------------------------------------|---|--|
